# Supplementary material for: Fluorescence tagged salivary exosomes as a nano tool in early diagnosis of Parkinson’s disease
Source: Research Square preprint supplement (doi:10.21203/rs.3.rs-1621589/v1), 2022-05-16
Supplement: Supplementary file 1 [file 281f54c19cf4225530a69a4b.docx]

**Fig 1: TEM image of the isolated salivary exosomes at the scale of 200nm**

**

**

**Supplementary Table1**

| **Striatal ratios** | **exosome concentration (particle/ml)** | **Fluorescent-tagged exosome (particle/ml)** | **Antibody-tagged exosome (particle/ml)** | **α-synuclein concentration**  **(pg/ml)** |
| --- | --- | --- | --- | --- |
|  | **r** | **r** | **r** | **r** |
| **WSBR [R]** | 0.3591 | -0.3000 | -0.9000 | -0.6000 |
| **p value** | 0.6333 | 0.6838 | 0.0833 | 0.4167 |
| **WSBR [L]** | -0.1026 | -0.6000 | -0.3000 | -0.2000 |
| **p value** | 0.8333 | 0.3500 | 0.6831 | 0.9167 |
| **PBR [R]** | 0.1539 | 0.1000 | -0.2000 | -0.4000 |
| **p value** | 0.8333 | 0.9500 | 0.7833 | 0.7500 |
| **PBR [L]** | 0.2052 | -0.7000 | -0.6000 | -0.6000 |
| **p value** | 0.7667 | 0.2333 | 0.3500 | 0.4167 |
| **CBR [R]** | 0.4617 | 0.3000 | -0.6000 | -0.8000 |
| **p value** | 0.4333 | 0.6833 | 0.3500 | 0.3333 |
| **CBR [L]** | 0.6669 | 0.3000 | 0.4000 | 0.8000 |
| **p value** | 0.2667 | 0.6833 | 0.5167 | 0.3333 |

**Supplementary Table1: The spearman rank correlation between the striatal ratios and exosome concentration, Fluorescent-tagged exosome concentration, Antibody-tagged exosome concentration, α-synuclein concentration. ‘r’ represents the correlation coefficient**
